# Supplementary material for: Converting endogenous genes of the malaria mosquito into simple non-autonomous gene drives for population replacement
Source: eLife. 2021 Apr 13;10:e58791. doi: 10.7554/eLife.58791 (PMC8043746; doi:10.7554/eLife.58791)
Supplement: Supplementary file 1. — Table S1. Guide RNA and target site characteristics. The start codon of the target gene is indicated within the gRNA sequence (bold) and the protospacer adjacent motif (PAM) separated via a hyphen. All predicted off-target cleavage sites were found to be located in non-coding (NC) regions and the number of mismatches (MM) is indicated. The number of SNPs within the 24 individuals of the G3 strain and within the Ag1000G is indicated. The SNPs observed for CP in the Ag1000G did not pass the quality control. Table S2. Primers used in this study. Table S3. Plasmids used in this study. Table S4. Transmission rate of control-crosses without Cas9. Table S5. Transmission rates and homing rates. Epos and Eneg refer to individuals with or without the effector construct, respectively. The homing rate e was calculated as follows: e = (n*0.5–Eneg)/(n*0.5)*100. Table S6. Modified sequences identified in the Amplicon sequencing. Table S7. Raw data of the transmission blocking assay. [file elife-58791-supp1.xlsx]

## Sheet: Table S1
gene	AGAP	chrom.	gRNA-PAM	activity	off-target score	off-targets	MM	G3	Ag1000G
CP	9593	3R	AGCAAGCGGTCGATTGAACA-TGG	59	50	3 NC	0/2/3	0	no pass
AP2	6400	2L	ACGGGACACTCATGAACCGT-TGG	53	99	1 NC	3	0	9
Aper1	6795	2L	CTTCACACTGCGCCAACTCT-GGG	48	98	4 NC	3	0	4

## Sheet: Table S2
number	name	sequence
5	GFP-F	GTGAGCAAGGGCGAGGAGCTG
6	F2A-R	AGGGCCCGGGTTCGACTCCAC
7	SpeI-ori-F	ACTAGTCGCGTTGCTGGCGTTTTTCC
8	Amp-R	AACCGTGCGTTATTTTTCTAAATACATTCAAATATG
9	3xP3-F	GAAAAATAACGCACGGTTCCCACAATGGTTAATTC
10	BB-SV40-R	CTCGAGAAGATACATTGATGAGTTTGG
15	U6Term-AflII-R	acgacggccagtcttaaggggacccacgcgtaaaaaaaagc
26	lox-AgU6-F	aagtgacacgacgccgattttgtatgcgtgcgcttgaag
27	AgU6-Bbs-R	AGGTCTTCTCGAAGACCCCagcagagagcaactccatttc
28	BB-scaffold-F	GGGTCTTCGAGAAGACCTgttttagagctagaaatagcaag
29	BB-lox-R	ttcaagcgcacgcatacaaaatcggcgtcgtgtcacttc
30	ori-F	tgctttttttttttccataggctccgcccccc
31	Amp-R2	tcgcgttctacataccggtcgcggaacccctatttgttta
32	vas-AgU6-F	cacattttcgggcgcgcctttgtatgcgtgcgcttgaag
33	scaffold-ori-R	tatggaaaaaaaaaaagcaccgactcggtgccac
39	CP-gRNA59-F	tgctGAGCAAGCGGTCGATTGAACA
40	CP-gRNA59-R	aaacTGTTCAATCGACCGCTTGCTC
41	CP-HA5-F	ATCAATGTATCTTCTCGAGTGTTGATCGGGTTTGACACAAAG
42	CP-HA5-R	agaTCTTGGAGAAGTTCATgtTCAATCGACCGCTTGCTTGCAC
43	CP-HA3-F	TGGAGTCGAACCCGGGCCCTATGGTGCGATTAAACAGTGCAG
44	CP-HA3-R	ACGCCAGCAACGCGACTAGTATTGCTCGTGCCCTGCTCGGCCCA
47	between-F	attatgatctagagtcgcggccgc
48	between-R	ccgcgactctagatcataatcag
50	BB-Kozac-R	cgtcagcttcgagttcatggtggcgcagatctgttaacg
51	scorpine-F	ccaccatgaactcgaagctgacggccctg
52	scorpine-R	agctcctcgcccttgctcacTCCGG
53	F2A-long-F	aagCGCGCCAAGCGCGCCCCGGTGAAGCAGACGCTGAACTTCGACCTGCTGAAGCTGGC
54	F2A-long-R	CGGGTTCGACTCCACGTCGCCGGCCAGCTTCAGCAGGTCGAAGTTCAGCGTCTGCTTCA
55	GFP-furin-R	CCGGGGCGCGCTTGGCGCGcttgtacagctcgtccatgccgag
56	F2A-BB-F	CGGCGACGTGGAGTCGAACCCGGGCCCTtctagaggatctttgtgaaggaac
57	AP2-gRNA53-F	tgctGACGGGACACTCATGAACCGT
58	AP2-gRNA53-R	aaacACGGTTCATGAGTGTCCCGTC
59	AP2-HA5-F	TCAATGTATCTTCTCGAGATGCGAAACAAAGCAATCCACGAC
60	AP2-HA5-R	tcagcttcgagttcatggtggGAGTGTCCCGTTTTGGTTTTGGACTG
61	AP2-HA3-F	AGTCGAACCCGGGCCCTATGAACCGTTGGGGCGCTTGGGAGG
62	AP2-HA3-R	ACGCCAGCAACGCGACTAGTTCTACTGTTTCTGAACTTCTGCAATC
69	RGSG-Scorp-F	AgGAacgcGGATCCGGAggctggatcaacgaggagaagatcc
70	Per1-GFP-R	gcgATACTTCActtgtacagctcgtccatgccgag
71	Per1-HA5-F	TCAATGTATCTTCTCGAGACACTTTCTCACGAGCGGTCAGGGTG
72	Per1-HA5-R	ccTCCGGATCCgcgtTCcTCgCAtTGaGCtAAtTCaGGaAAGTCGCAATAG
73	Per1-HA3-F	tacaagTGAAGTATCGCTCAAAGTGCTCGAGCTG
74	Per1-HA3-R	GCCAGCAACGCGACTAGTAACACAGTACGGCGGAGTCTGTAAAGG
75	Per1-gRNA48-F	tgctGTTCACACTGCGCCAACTCT
76	Per1-gRNA48-R	aaacAGAGTTGGCGCAGTGTGAAC
77	Arg-GSG-Arg-Scorp-F	gcGGATCCGGAcgcggctggatcaacgaggagaag
78	GFP-R	cttgtacagctcgtccatgccgag
85	Scorp-F2A-F	gctgtcgtacCGCGCCAAGCGCGCCCCGGTGAAGC
86	intron1-Scorp-R	tgatacttaccttctcgcccgacgtctggcagtg
87	Scorp1-intron-F	gcgagaaggtaagtatcacacacgattaac
88	SV40-loxP-R	atgtatcttaagctataacttcgtataatgtatg
89	loxP-SV40-F	ttatagcttaagatacattgatgagtttgg
90	3xP3-intron-R	tctagaactagtggatcttaattaaccacaatggttaattc
91	marker-lox-F	aagatccactagttctagagcggataac
92	intron2-Scor2-R	gccgcacttgcacttcgtgccgtggcagtagccctgtaagcataagcaaagaaaaaatg
93	CP-HA5-Scorp-R	tcagcttcgagttcatggtggTCAATCGACCGCTTGCTTGCACGAAC
95	Per1-HA5-Arg-GSG-R	agccgcgTCCGGATCCgcgtTCcTCgCAtTGaGCtAAtTCaGGaAAGTCGCAATAG
96	Per1-HA3-scorp-F	acgccgctgtcgtacTAAAGTATCGCTCAAAGTGCTCGAGCTG
97	Scorpine-STOP-R	TTAgtacgacagcggcgtgccgcacttgcacttcgtgccgtggcagtagcc
98	Scorp-F2A-long-F	acgaagtgcaagtgcggcacgccgctgtcgtacCGCGCCAAGCGCGCCCCGGTGAAGC
99	CP-locus-F	ATTATCGGAAATTCTCCACAAAGCG
100	CP-locus-R	TCATGGTGCGATTCTGATGCGATCG
101	AP-locus-F	ATCAGACTTTAAGCCTTTGTCGTC
102	AP-locus-R	ACCGTTCGCGATTCAGCAGTACAGG
105	Per1-locus-F	TGTCCACCCGGGTTGCTGTGGAATG
106	Per1-locus-R	AACTGTAAATGATATAACACTATCC
109	CP-takara-F	CCTCTAATACGACTCACTATAggAGCAAGCGGTCGATTGAACAGTTTAAGAGCTATGC
110	AP-takara-F	CCTCTAATACGACTCACTATAggACGGGACACTCATGAACCGTGTTTAAGAGCTATGC
112	Per1-takara-F	CCTCTAATACGACTCACTATAggTTCACACTGCGCCAACTCTGTTTAAGAGCTATGC
116	CP-ctrl-F	AAATACATGACTGAGGACCAAATTCC
117	CP-ctrl-R	TCCACAAACGCAGCCAGCGAACGGGTC
118	AP-ctrl-F	TCTCACGCTATCCCGCCCAATTAAGC
119	AP-ctrl-R	TTCTTTCAGTTTCCACCTGTCCAACC
122	Per1-ctrl-F	TTTCATTAGTGTGGACGCGGGAAC
123	Per1-ctrl-R	TCGACCGGAAATGGTAGAGTTCGGTCG
128	STOP-linker	TAAgTAAcTAAcataacttcgtatagcatac
129	scaff-U6term-R	acaaaaaagcaccgactcggtgccac
160	Sco-probe-F	ATGAACTCGAAGCTGACGGCCCTG
161	Sco-probe-R	ACGTCTGGCAGTGCTTCTCGCAGTTGC
162	Sco-probe-2-R	tacgacagcggcgtgccgcacttg
212	q-Sco1-F	agctgacggccctgatcttcc
213	q-Sco1-F1	atgggcaacacggtgctgg
214	q-Sco1-F2	actgcggctggatcaacgagg
215	q-Sco1-R	tcgcagttgcccagcatgtcc
216	q-Sco-int-R	tggcagtagcccttctcgcc
217	q-Sco2-R	TTGGCGCGgtacgacagcg
218	q-CP-F	AACGAACAAGCGCGCCAAGG
219	q-CP-R	ATTCTGATGCGATCGTCCTGCG
220	q-AP-F	TGAACCGTTGGGGCGCTTGG
221	q-AP-R	AGCTCGTGGGCCATATGCTTCC
222	q-GFP1-F1	atctgcaccaccggcaagc
223	q-GFP-int-R	aagatggtgcgctcctggacg
224	q-GFP1-F2	taccccgaccacatgaagcagc
225	q-GFP2-R	tcgccctcgaacttcacctcgg
226	q-linker-F	tcgtacGGATCCGGAgtgagc
227	q-F2A-R	AGTTCAGCGTCTGCTTCACCG
228	q-S7-F	TTCTCCGGCAAGCACGTCG
229	q-S7-R	ACGCTTGCCGACCACCTCC
230	Per-short-F	ATCCCGACCATATGGTGTACATTCC
231	Per-short-R	ACACGAGAAGAAACCCCCATTCC
245	q-Sco-int-F	tcgggcgagaagggctactgc
246	q-CP-R2	AGCCGGCTGCACTGTTTAATCG
270	q-CP-F1	ACGAGATTGCCGAGGCGAC
271	q-CP-R3	AGCTCCAGTCAACGCTCGACC
272	q-Per1-F1	TTGAGCTGGAGCAGACGTGCC
273	q-Sco1-R2	tgttgcccatgcgctcgtcg
274	q-Per1-F	AAACCGTCACCCAACTGTCCG
275	q-Per1-R	TCCAGCTCAACGCCGTACGG
340	CP-Taq-F	AAAAAGCCCACTCCAGCA
341	CP-Taq-R	ATCAGGCCCAGGAAGATCA
342	AP-Taq-F	GTCCATCAAGCGATCAGAAC
343	AP-Taq-R	ATCAGGCCCAGGAAGATCAG
344	Per-Taq-F	TGCTTACAGGGCTACTGCCA
345	Per-Taq-R	GACACGAGAAGAAACCCCCA
396	qAP2-F2	TGGCAATGGACCCGACGG
397	qAP2-R2	TGTTCGCGTACAGGGCTGC
447	S7-F	TCCTGGAGCTGGAGATGAAC
448	S7-R	GACGGGTCTGTACCTTCTGG
450	qAP-F3	TGCCTTTGAGCGTTTGAAGTGG
451	qAP-R3	ACCCGTCAGAAAGGCTGTCC
522	qSco1-all-F	GCTGGATCAACGAGGAGAAGAT
523	qSco1-all-R	GTTGGCCATGCACTGGAACT
524	CP-ampli-R	ATCGCTCGCCTGCTCCATGG
A3	AP-PrimerC-F	ACATGTATGCATACCAGTGCATTG

## Sheet: Table S3
plasmid	type	Resistance marker	marker	notes
pQUAST 3xP3 CFP	template	Amp	Pax-CFP	A. Nash, unpublished
p163-pattP-P3GFP	template	Amp	Pax-EGFP	Hammond et al. 2016
p165-pvasa-hCas9-U6	template	Chlor	Pax-RFP	Hammond et al. 2016
p155-pattB-CFP-vas2-hCas9	helper	Amp	Pax-CFP	Hammond et al. 2016
pI-Scorpine-GFP	intermediate	Amp	Pax-CFP	intron in GFP, longer Pax promoter
pI-Scorpine-GFP-AP2	intermediate	Amp	Pax-CFP
pD-ScoG-AP2	donor	Amp	Pax-CFP	at ATG, F2A
pI-Sco	intermediate	Amp	Pax-EGFP	intron in Scorpine, shorter Pax promoter
pI-Sco-CP	intermediate	Amp	Pax-EGFP
pI-Sco-Per1	intermediate	Amp	Pax-EGFP
pD-Sco-CP	donor	Amp	Pax-EGFP	at ATG, F2A
pD-Aper1-Sco	donor	Amp	Pax-EGFP	at STOP, no F2A

## Sheet: Table S4
strain	transheterozygote parent	WT	transgenic	total	transmission rate ctrl %
ScoGFP-CP	paternal	451	588	1039	56.5929
	maternal	382	427	809	52.7812
	overall	833	1015	1848	54.9242
Aper1-ScoGFP	paternal	458	456	914	49.8906
	maternal	515	491	1006	48.8072
	overall	973	947	1920	49.3229
ScoGCFP-AP2	paternal	268	245	513	47.7583
	maternal	380	340	720	47.2222
	overall	648	585	1233	47.4453

## Sheet: Table S5
		1st cross				2nd cross						effector				transmission rate			homing rate			overall homing rate
strain	replicate	Trans male	Cas9 female	Trans female	Cas9 male	Trans,Cas9	WT G3	transhemizygote parent	total progeny analyzed	Cas9 %	excluded (Cas9+)	Epos	Eneg	n	n/2	transmission rate %	mean	Stdev	homing rate %	mean	Stdev	mean	Stdev
ScoGFP-CP	1	15	9			20	20	paternal	265	44.5283	118	143	4	147	73.5	97.2789			94.5578
	2	30	30	30	30	62	61	paternal	757	52.9723	401	327	29	356	178	91.8539			83.7079
	3	60	55	60	60	90	65	paternal	1246	48.9567	610	633	3	636	318	99.5283			99.0566
	pooled							paternal	2268	49.7795	1129	1103	36	1139	569.5		96.2204	3.94517		92.4408	7.89034
	1	15	9			20	20	maternal	294	53.7415	158	136	0	136	68	100			100
	2	30	30	30	30	60	60	maternal	642	47.5078	305	337	0	337	168.5	100			100
	3	60	55	60	60	70	90	maternal	1216	48.602	591	620	5	625	312.5	99.2			98.4
	pooled							maternal	2152	48.9777	1054	1093	5	1098	549		99.7333	0.46188		99.4667	0.92376	95.9537	6.32877
Aper1GFP-Sco	1	23	45	41	46	78	120	paternal	317	39.7476	126	182	9	191	95.5	95.288			90.5759
	2	30	30	30	30	62	60	paternal	607	46.1285	280	327	0	327	163.5	100			100
	3	60	57	60	61	75	65	paternal	882	43.0839	380	502	0	502	251	100			100
	pooled							paternal	1806	43.5216	786	1011	9	1020	510		98.4293	2.7205		96.8586	5.441
	1	23	45	41	46	68	120	maternal	778	50.6427	394	384	0	384	192	100			100
	2	30	30	30	30	60	60	maternal	430	51.3953	221	209	0	209	104.5	100			100
	3	60	57	60	61	70	90	maternal	768	52.2135	401	367	0	367	183.5	100			100
	pooled							maternal	1976	51.417	1016	960	0	960	480		100	0		100	0	98.4293	3.84737
ScoGCFP-AP2	1	30	30	30	30	90	65	paternal	417	n.a.	n.a.	407	10	417	208.5	97.6019			95.2038
	2	35	38	36	36	44	64	paternal	1328	n.a.	n.a.	1173	155	1328	664	88.3283			76.6566
	3	60	56	60	69	84	92	paternal	413	n.a.	n.a.	378	35	413	206.5	91.5254			83.0508
	pooled							paternal	2158	n.a.	n.a.	1958	200	2158	1079		92.4852	4.71072		84.9704	9.42143
	1			9	15	14	20	maternal	931	n.a.	n.a.	864	67	931	465.5	92.8034			85.6069
	2	35	38	36	36	27	57	maternal	305	n.a.	n.a.	294	11	305	152.5	96.3934			92.7869
	3	60	56	60	69	86	94	maternal	872	n.a.	n.a.	843	29	872	436	96.6743			93.3486
	pooled							maternal	2108	n.a.	n.a.	2001	107	2108	1054		95.2904	2.15834		90.5808	4.31669	87.7756	7.2389
ScoG-AP2	1	45	30	30	45	24	55	paternal	142	n.a.	n.a.	141	1	142	71	99.2958			98.5915
	2	45	30	30	45	35	27	paternal	68	n.a.	n.a.	67	1	68	34	98.5294			97.0588
	3	99	76	65	154	96	66	paternal	75	n.a.	n.a.	72	3	75	37.5	96			92
	pooled							paternal	285	n.a.	n.a.	280	5	285	142.5		97.9417	1.72469		95.8835	3.44938
	1	45	30	30	45	36	33	maternal	70	n.a.	n.a.	70	0	70	35	100			100
	2	45	30	30	45	13	60	maternal	71	n.a.	n.a.	71	0	71	35.5	100			100
	3	99	76	65	154	64	89	maternal	90	n.a.	n.a.	82	8	90	45	91.1111			82.2222
	pooled							maternal	231	n.a.	n.a.	223	8	231	115.5		97.037	5.132		94.0741	10.264	94.9788	6.91964

## Sheet: Table S6
		%		reads		reads
		unmodified	modified	unmodified	modified	Noncoding mutation	In-frame mutation	Frameshift mutation
CP	Cas9	96.78	3.22	289387	9625	9625	0	0
	G3	96.34	3.66	312976	11903	11899	1	3
	paternal	82.76	17.24	250284	52124	48960	482	2682
	maternal	26.28	73.72	95495	267925	200698	21778	45449
AP	Cas9	99.45	0.55	243179	1348	0	1156	192
	G3	99.43	0.57	274151	1561	0	1387	174
	paternal	62.8	37.2	141155	83604	0	57218	26386
	maternal	7.48	92.52	17001	210222	0	70874	139348
Per	Cas9	99.9	0.1	462461	443	0	333	110
	G3	99.79	0.21	203826	432	0	321	111
	paternal	88.78	11.22	162119	20487	0	4539	15948
	maternal	14	86	25592	157155	0	49344	107811

## Sheet: Table S7
ScoGFP-CP							ScoGCFP-AP2					Aper1-ScoGFP			Sco-CP							ScoG-AP2					Aper1-Sco
Rep1		Rep2		Rep3			Rep1		Rep2			Rep1			Rep1		Rep2		Rep3			Rep1		Rep2			Rep1		Rep2		Rep3		Rep4
WT	Trans	WT	Trans	WT	Trans		WT	Trans	WT	Trans		WT	Trans		WT	Trans	WT	Trans	WT	Trans		WT	Trans	WT	Trans		WT	Trans	WT	Trans	WT	Trans	WT	Trans
1	2	1	0	7	0		1	4	7	0		0	32		1	0	7	0	0	230		0	0	0	5		0	0	35	61	0	2	0	68
34	3	0	0	2	0		34	7	2	0		0	7		0	0	2	0	348	200		0	0	0	0		0	13	9	0	0	1	0	126
1	6	0	0	46	0		1	8	46	0		6	70		0	4	46	10	166	348		6	0	0	0		6	0	0	0	3	5	0	187
2	3	2	6	2	0		2	2	2	0		0	0		2	6	2	4	99	56		0	0	0	0		0	0	19	0	39	14	0	0
0	1	0	1	0	0		0	1	0	0		25	0		0	0	0	2	17	166		25	0	0	0		25	0	0	48	0	7	0	0
8	3	0	0	1	0		8	52	1	0		1	0		0	0	1	1	81	380		1	0	0	0		1	0	1	0	2	9	0	0
22	0	14	0	0	208		22	13	0	0		100	6		14	59	0	47	106	0		100	1	0	0		100	0	8	0	0	29	0	0
1	0	0	0	6	0		1	7	6	0		0	56		0	86	6	13	0	332		0	0	18	0		0	0	0	0	2	0	18	15
1	0	42	0	4	0		1	15	4	0		0	7		42	0	4	43	0	240		0	0	30	0		0	0	5	22	0	0	30	245
15	0	3	0	0	0		15	17	0	0		49	2		3	0	0	77	46	0		49	3	0	0		49	1	0	1	0	0	0	0
8	0	1	0	7	1		8	2	7	0		0	0		1	3	7	19	31	0		0	0	158	0		0	0	0	19	7	0	158	54
1	0	0	0	0	0		1	0	0	0		2	32		0	0	0	0	0	2		2	0	23	0		2	0	0	0	48	0	23	0
1	0	0	0	0	3		1	0	0	0		0	0		0	0	0	0	0	226		0	1	4	0		0	0		0	0	0	4	0
1	0	2	0	0	3		1	0	0	0		0	33		2	0	0	92	1	0		0	0	14	0		0	0			0	0	14	0
0	0	0	0	0	0		0	0	0	0		0	0		0	10	0	2	0	2		0	3	0	0		0	0			5	0	0	0
0	0	0	0	0	0		0	0	0	0		0	2		0	2	0	10	0	0		0	0	0	0		0	0			0	0	0	19
0	0	0	0	3	0		0	0	3	0		7	77		0	0	3	0	47	1		7	0	0	0		7	0			4	0	0	0
0	0	4	0	0	0		0	0	0	0		0	0		4	6	0	5	0	0		0	0	1	0		0	0			0	0	1	0
0	0	0	0	0	6		0	0	0			18	3		0	0	0	0	0	28		18	0	1			18	0			0	0	1	0
0	0	0	1	0	0		0	0	0			0	0		0	0	0	0	21	204		0	1	4			0	0			0	0	4	0
0	0	1		0	0		0	0	0			4	0		1	0	0	0	0	368		4	5	21			4	0			0	0	21	0
0	0	0		0	59		0	0	0			1	6		0		0	11	0	300		1	6	0			1	1			0	0	0	8
0	0	0		0	0		0	0	0			2	0		0		0		0	0		2	16	0			2	0			41	0	0	1
0	0	0		0	0		0	0	0			0	1		0		0		0	222		0	0	23			0				0	0	23	25
0	0	10		0	0		0	0	0			0	73		10		0		16	225		0	24	1			0				0	0	1	0
0	0	0		0	0		0	0	0			43			0		0		0	150		43	0	34			43				15	0	34	0
0	0	0		1	0		0	0	1			27			0		1		0	94		27	0	0			27				0	0	0
0	0	0		5	0		0	0	5			6			0		5		0	129		6	5	0			6				0	0	0
0	0	0		0	0		0	0	0			0			0		0		63	56		0	0	0			0				0	0	0
0	0	0		0	0		0	0	0			6			0		0		56	67		6	8	64			6				0	0	64
0	0			0	12		0		0			40					0		91	185		40	0	56			40				0	0	56
	0			0	0				0			6					0		0	173		6	0	18			6				0	0	18
	0				0							0							0			0	7	215			0				0	0	215
	0				0							40							0			40	0	0			40				0	0	0
	0				0							13							0			13	25	0			13				0	0	0
	0				0							4							0			4	0	0			4				0	0	0
	0											12							4			12	1	34			12				0	0	34
	0																		9				4	1							0	0	1
	0																		9				0	0							0	0	0
	0																		9				0	0							0	0	0
																							0	0							0	0	0
																							1								0	0
																							42								0	0
																							0								0	0
																							10								0	0
																							0								0	0
																							0								0	0
																							13								0	0
																															0	0
																															0	0
																																0
																																0
																																0
																																0
																																0
																																0
																																0
																																0
																																0
																																0
																																0
																																0
																																0
																																0
